# Supplementary material
Source: publisher figshare collection journal article supplement (https://tandf.figshare.com/ndownloader/files/16851494)
Supplement: Supplementary file 1 [file 16851494]

**Supplementary Material**

Synthesis, characterization and crystal structures of oxidovanadium(V) hydrazone complexes with antibacterial activity

DONG-LAI PENG

Figure S1. IR spectrum of **1**.

Figure S2. UV-Vis spectrum of **1**.

Figure S3. IR spectrum of **2**.

Figure S4. UV-Vis spectrum of **2**.
